# Supplementary material for: A β-Alanine Catabolism Pathway Containing a Highly Promiscuous ω-Transaminase in the 12-Aminododecanate-Degrading Pseudomonas sp. Strain AAC
Source: PubMed Central journal article supplement (PMC4907197; doi:10.1128/aem.00665-16), 2016-06-13
Supplement: AEM.00665-16_zam999117220so1.pdf [file AEM.00665-16_zam999117220so1.pdf]

## Supplementary Materials

Figure S1 – Structures for each substrate tested, with specific activity shown below ( $\text{nmol}\cdot\text{min}^{-1}\cdot\text{mg}^{-1}$ ).

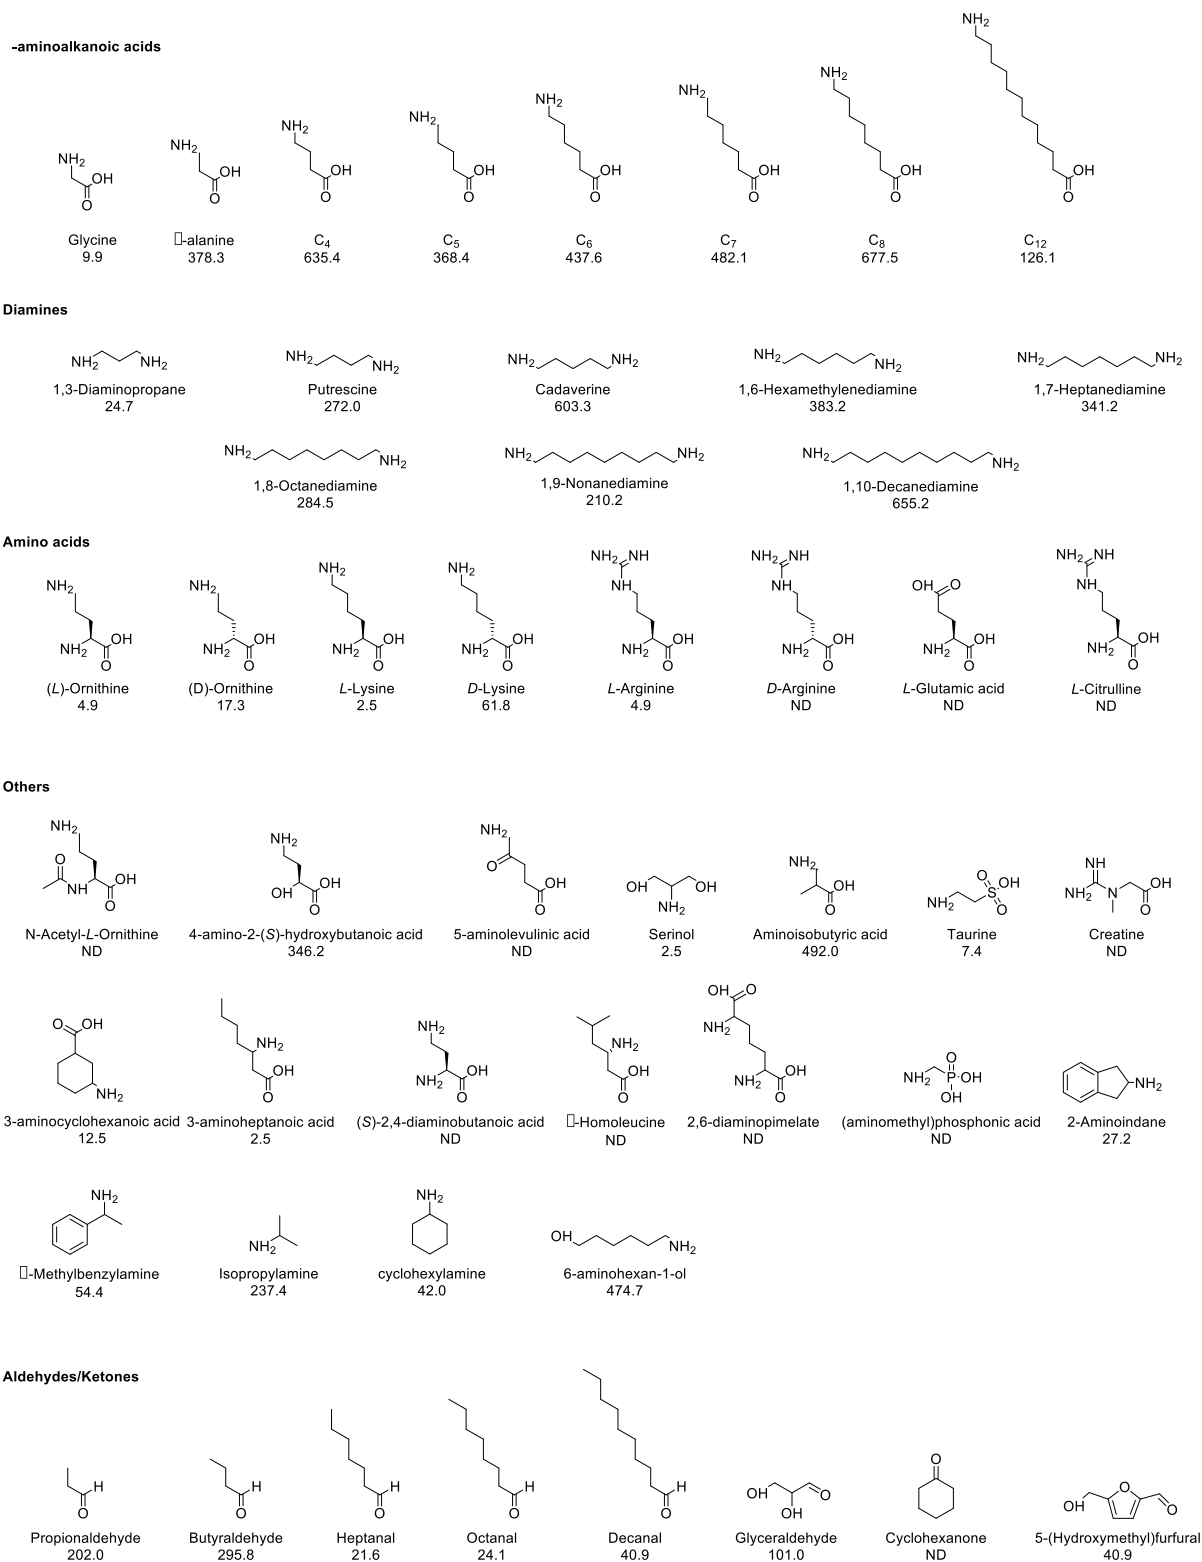

Figure S2 – Chain length vs. Specific Activity. SD shown as error bars.

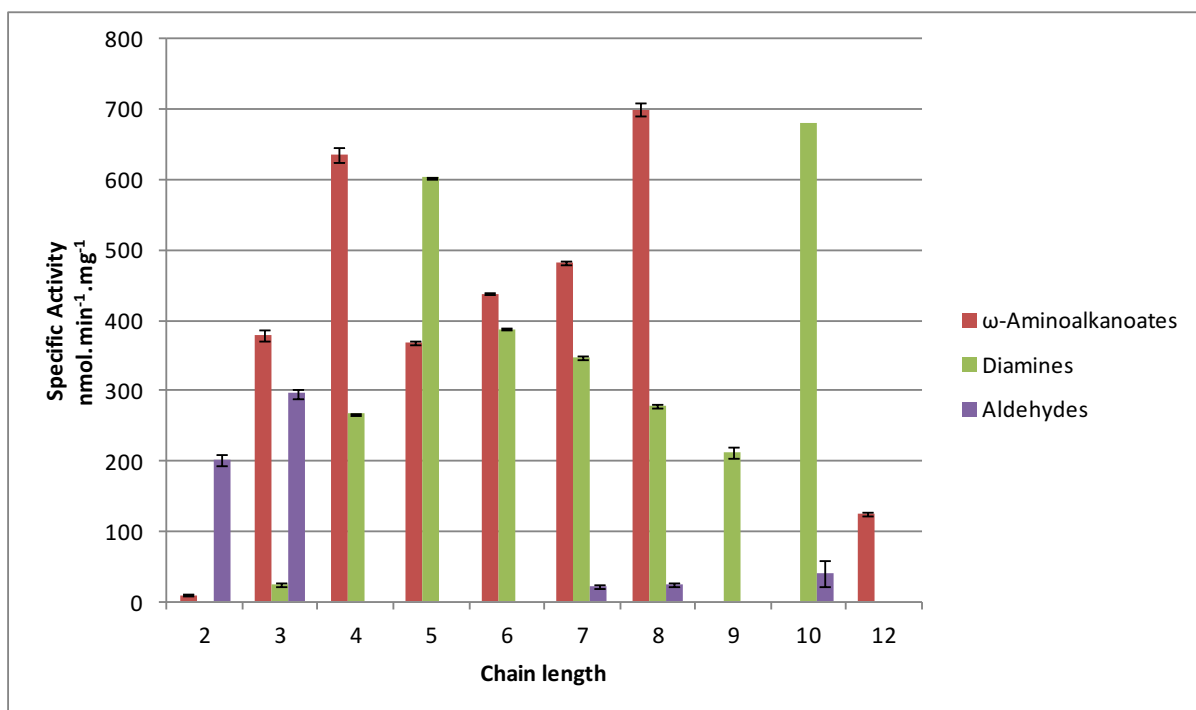

Figure S3 – KES23458 Gel Filtration Trace

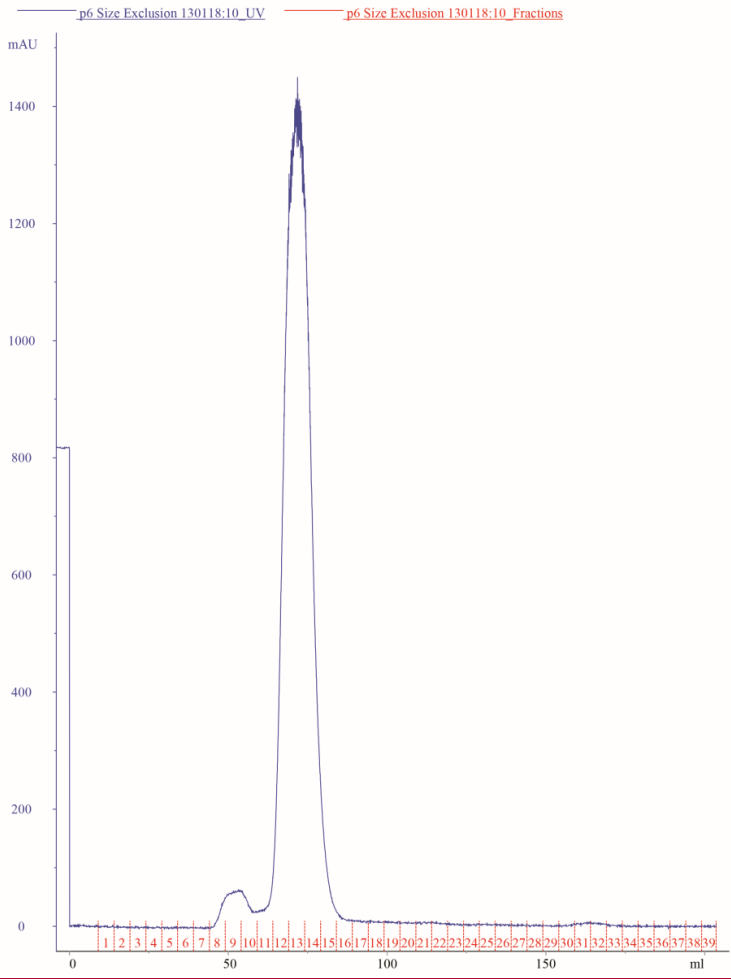

Figure S4 (a) – KES23458 thermotolerance by residual activity. Activity was measured using a standard assay as described in the Experimental section and the data was fitted to a sigmoidal curve with equation  $f(T) = 100/(1 + e^{(T-T_{50})})$  where T is the temperature and  $f(T)$  is the residual activity (%) at a given T.

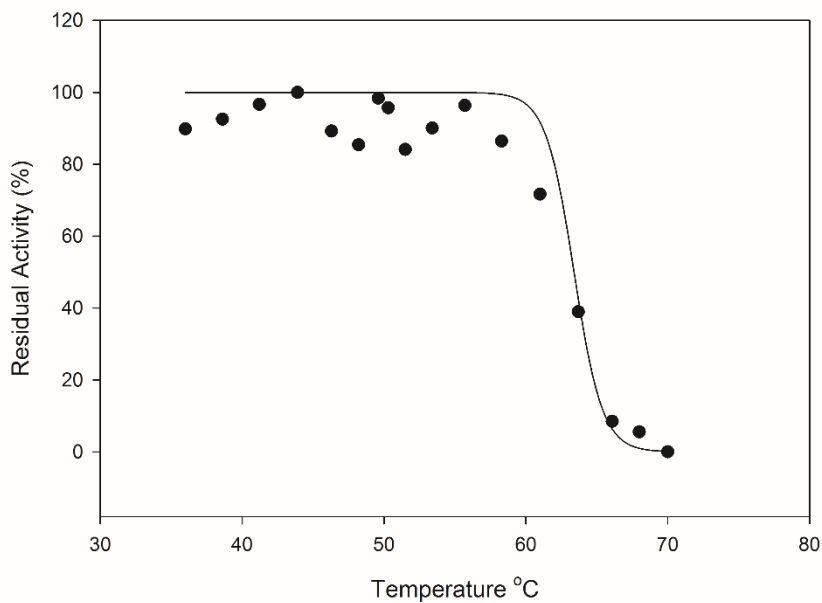

Figure S4 (b) – Triplicate replicates of a Differential Scanning Fluorimetry assay of KES23458 in 10 mM phosphate buffer.  $T_m$  is defined as the inflection point of the sigmoidal transition, and was measured to be 58.1 °C.

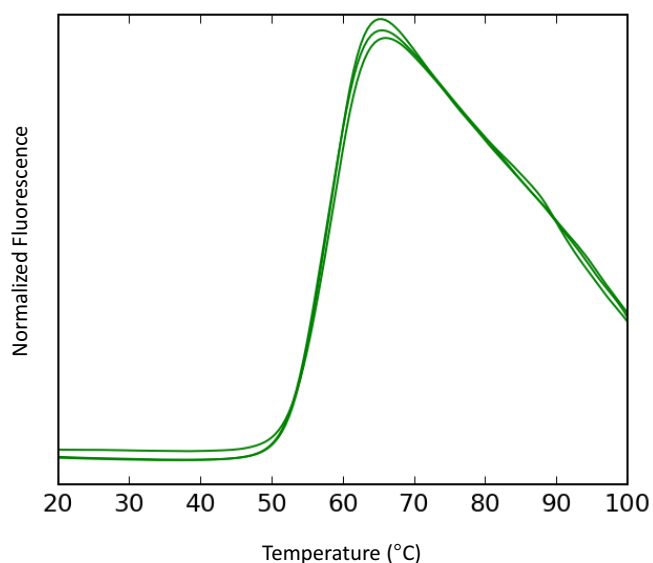

Figure S4 (c) – Triplicate replicates of a Differential Scanning Fluorimetry assay of KES23458 in a range of buffers, salts and pHs. The red dashed line is at 58 degrees ( $T_m$  in the original phosphate buffer).

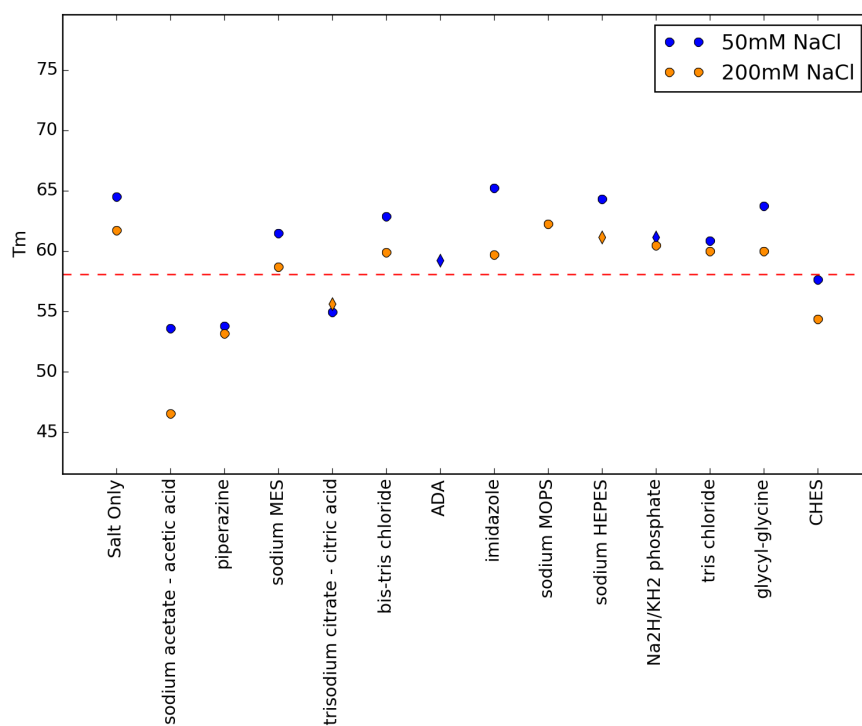

Figure S5– TA Crystal

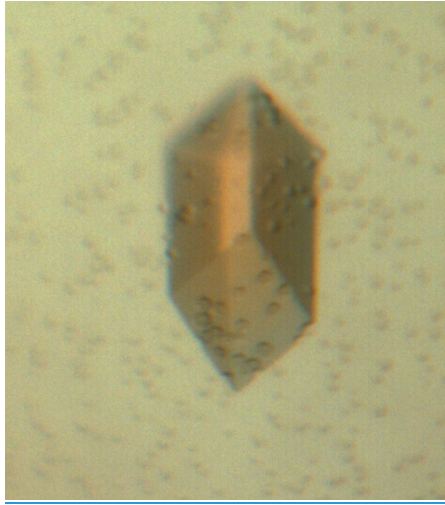

Figure S6 – Mass spectrometry data. Top: Untreated KES23458. Bottom: KES23458 treated with NaBH<sub>4</sub>. m/z – 50168 – [apoprotein]<sup>+</sup>. 50397 – [Holoprotein]<sup>+</sup>. 50399 – [Holoprotein +2H]<sup>+</sup>.

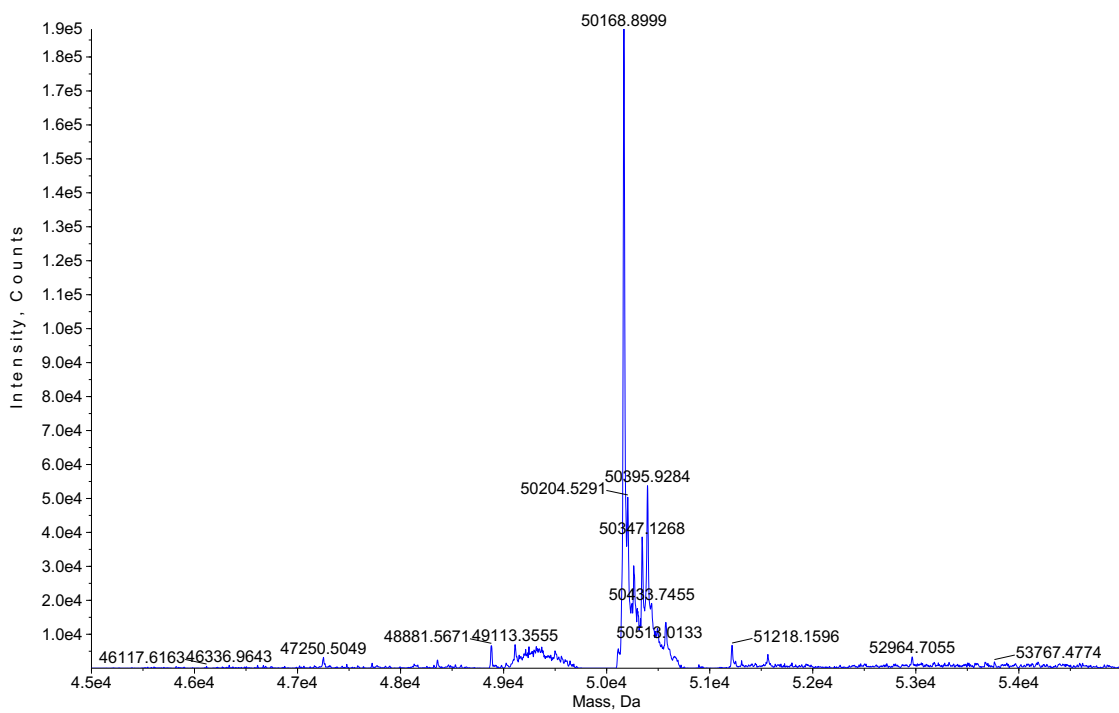

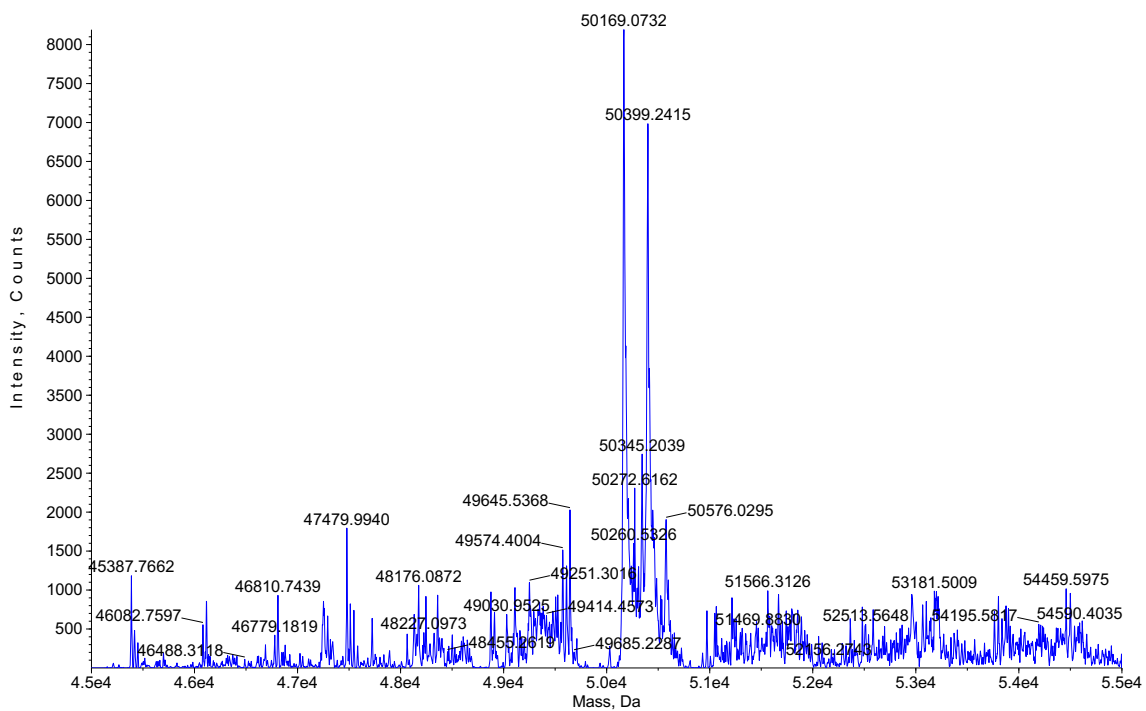

Figure S7 – RMSD analysis on KES23458 with  $\beta$ -alanine and 12-aminododecanoic acid docked.

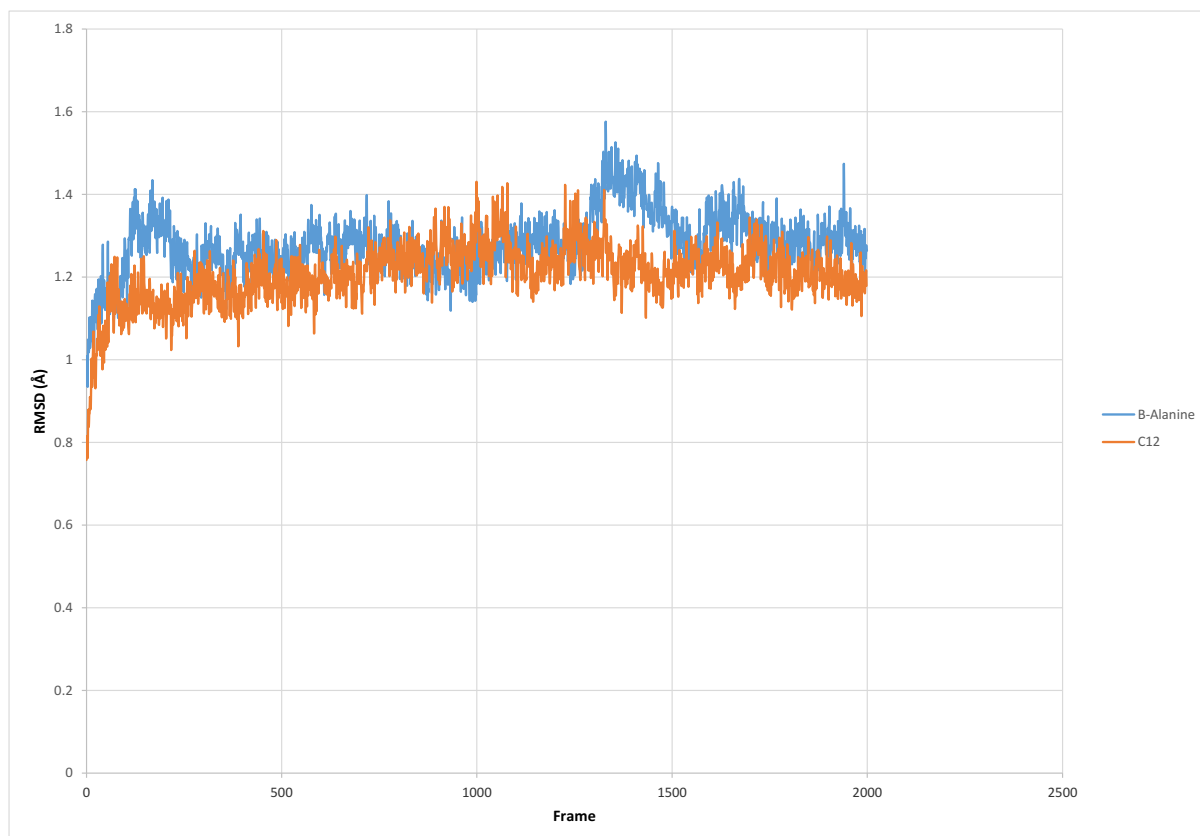

Table S1

Specific activities and relative substrate activities for KES23460.

| Substrate                | SA (nmol min <sup>-1</sup> mg <sup>-1</sup> ) | Relative Activity (%) |
|--------------------------|-----------------------------------------------|-----------------------|
| Glycine                  | N.D.                                          | N.D.                  |
| B-Alanine                | 535.0 ± 31.3                                  | 100                   |
| D/L-Aminoisobutyric acid | 15.8 ± 0.1                                    | 3.0                   |
| 4-Aminobutyric acid      | 33.2 ± 1.0                                    | 6.1                   |
| 5-Aminopentanoic acid    | 5.2 ± 0.3                                     | 0.7                   |
| 6-Aminohexanoic acid     | 4.7 ± 0.6                                     | 0.6                   |
| 1,3-Diaminopropane       | 1.4 ± 1.7                                     | 0.2                   |
| 1,6-Hexamethylenediamine | 4.9 ± 0.1                                     | 1.0                   |
| 1,7-Heptanediamine       | 4.5 ± 0.4                                     | 0.8                   |
| 1,8-Octanediamine        | 3.5 ± 0.6                                     | 0.6                   |
| 1,9-Nonanediamine        | 4.2 ± 0.4                                     | 0.7                   |
| 1,10-Decanediamine       | N.D.                                          | N.D.                  |

Note that in each case the acceptor used was pyruvate. Assay conditions as described in Experimental section in potassium phosphate buffer (100 mM, pH 9). ND – Activity not determined

KES23458 Peptide sequence including N-terminal His<sub>6</sub>-Tag

MGSSHHHHHSSGLVPRGSHMNQQVNVAPSAADLNLKAHWMPFSANRNFHKDPRIIVAAEGSWL  
VDDKGRRIYDSLGLWTCGAGHSRKEIADAVAKQIGTLDYSPGFQYGHPLSFQLAEKIAQMTPGTLT  
HVFFTGSSECADTSIKMARAYWRIKQQAQKTKLIGRARGYHGVNVAGTSLGGIGGNRKMFGPLMD  
VDHLPHTLQPGMAFTKGAETGGVELANELLKLIELHDASNIAAVIVEPMSGSGAGVIVPPKGYLQRLRE  
ICDANDILLIFDEVITAFGRMGKATGAEYFGVTPDIMNVAKQVTNGAVPMGAVIASSEIYDTFMNQNL  
EYAVEFGHGYTSAHPVACAAGIAALDLLQKENLIQQSAELAPHFEKALHGLKGTKNVIDIRNCGLAGA  
IQIAARDGDAIVRPFEASMKLWKEGFYVRFGGDTLQFGPTFNAKPEDLDRLFDAVGEALNGVA

KES23460 Peptide sequence including N-terminal His<sub>6</sub>-Tag

MRGSHHHHHHGMASMTGGQQMGRDLYDDDDKGSMTLLIKHLIGGELIADTGRADVFNPSTGEAV  
RKVPLADRETMQQAIDAAKAAFPWRNTPPAKRAQVLFKQKLLANEERIVKLISEEHGKTIEDAAG  
ELKRGIEVYATAAPEILKGEYSRNVGPNIDAWSDFQPIGVVAGITPFNFPAMVPLWMYPLAIACGNT  
FILKPSERDPSSTLLIAELFHEAGLPKGVNLVHGDKGAVDALIEAPEVKALSFVGSSTPIAEYIYSEGTK

RGKRVQALGGAKNHAVLMPDADLDNAVSAALMGAAYGSCGERCMAISVAVCVGDQIADALVQKLVPO  
IKGLKIGAGTSCGLDMGPLVTGAARDKVTGYIDTGVAQGAELVVDGRGYKVAGHENGFFLGGTLFDR  
VTPEMTIYKEEIFGPVLCIVRVNSLEEAMQLINDHEYGNGTICIFTRDGEAARLFCDEIEVGMVGVNVPL  
PVPVAYHSFGGWKRSLFGDLHAYGPDGVRFYTKRKAITQRWPQRKSHEAAQFAFPSNS
